# Supplementary material for: The Development of the Military Service Identification Tool: Identifying Military Veterans in a Clinical Research Database Using Natural Language Processing and Machine Learning
Source: PubMed Central journal article supplement (PMC7281146; doi:10.2196/15852), 2020-05-25
Supplement: medinform_v8i5e15852_app1.pdf [file medinform_v8i5e15852_app1.pdf]

## Supplementary Material

Table 1: Primary search terms used for the development of the tools.

| Search term   | Comments                                                                        |
|---------------|---------------------------------------------------------------------------------|
| join*         |                                                                                 |
| enlist*       |                                                                                 |
| conscript*    |                                                                                 |
| demob*        |                                                                                 |
| discharge*    | Mainly used in context “discharged from ward”, etc                              |
| serv*         | eg served, service                                                              |
| mobil*        | Mainly occurs as “mobility”. One observed use: “mobilised for military service” |
| army          |                                                                                 |
| armed force*  |                                                                                 |
| airforce      | “air force” or “airforce”                                                       |
| marine*       |                                                                                 |
| military      |                                                                                 |
| navy          |                                                                                 |
| naval         |                                                                                 |
| RAF           | “RAF”, “R A F”, “R.A.F.” or “R. A. F.”                                          |
| RN            | “RN”, “R N”, “R.N.” or “R. N.”                                                  |
| TA            |                                                                                 |
| ATS           | “ATS” or “Auxiliary Territorial Service”                                        |
| WRAF          |                                                                                 |
| WAAF          |                                                                                 |
| WREN*         | WRNS. Exclude “wrench”                                                          |
| WRNS          |                                                                                 |
| WRAC          |                                                                                 |
| H4H           | “H4H” or “Help for Heroes”                                                      |
| combat stress |                                                                                 |
| squadron      |                                                                                 |
| veteran       |                                                                                 |

Table 2: Secondary search terms used for the development of tools.

| Include                                                                                                                                                                                                                                                                                                                                                                                                                   | Exclude                                                                                                                                                                                                                                                                                                                                                                                                                                                                                                                                                                                                                    | Exclude (family member)                                                                                                     |
|---------------------------------------------------------------------------------------------------------------------------------------------------------------------------------------------------------------------------------------------------------------------------------------------------------------------------------------------------------------------------------------------------------------------------|----------------------------------------------------------------------------------------------------------------------------------------------------------------------------------------------------------------------------------------------------------------------------------------------------------------------------------------------------------------------------------------------------------------------------------------------------------------------------------------------------------------------------------------------------------------------------------------------------------------------------|-----------------------------------------------------------------------------------------------------------------------------|
| <p>British <b>Army</b><br/>Territorial <b>Army</b></p> <p>Royal <b>Navy</b><br/>Royal <b>Marines</b><br/>Royal <b>Air Force</b></p> <p>active <b>service</b><br/>army <b>service</b><br/>ex-<b>service</b><br/><b>veteran</b><br/>military <b>service</b><br/>national <b>service</b><br/>naval <b>service</b><br/><b>serviceman</b><br/><b>servicewoman</b><br/>submarine <b>service</b><br/>veterans <b>service</b></p> | <p>Salvation <b>Army</b><br/>Church <b>Army</b><br/>Land <b>Army</b><br/>British <b>Army</b> Schools</p> <p><b>army</b> fatigues</p> <p>Merchant <b>Navy</b><br/>Mercantile <b>Marine</b></p> <p><b>military</b> boarding school</p> <p><b>joiner</b>*<br/><b>joint</b>*<br/><b>wrench</b><br/><b>observed</b><br/><b>reserved</b><br/><b>deserved</b></p> <p><b>served</b> &amp; prison<br/><b>served</b> &amp; custodial</p> <p>Iranian <b>Air Force</b><br/>US <b>Army</b><br/>US <b>Marine</b> Corps<br/>Sri Lankan <b>army</b><br/>Sri Lankain <b>army</b><br/>Polish <b>military</b></p> <p>Idi Amin<br/>refugee</p> | <p>father<br/>mother<br/>parent<br/>brother<br/>sister<br/>uncle<br/>aunt<br/>dad</p> <p>husband<br/>partner<br/>spouse</p> |

Table 3: Additional edge-case terms used for the development of the rule-based tool to identify veterans.

| Search term      | Comments                                                                                                                                                                                                                                                                                                                                                                                                                                                                                                                                                                                                                                                     |
|------------------|--------------------------------------------------------------------------------------------------------------------------------------------------------------------------------------------------------------------------------------------------------------------------------------------------------------------------------------------------------------------------------------------------------------------------------------------------------------------------------------------------------------------------------------------------------------------------------------------------------------------------------------------------------------|
| squad            | RAF <b>squadron</b> (leader) x5<br>death squad x1                                                                                                                                                                                                                                                                                                                                                                                                                                                                                                                                                                                                            |
| soldier          | 19/33 related to military service                                                                                                                                                                                                                                                                                                                                                                                                                                                                                                                                                                                                                            |
| sailor           | 2/6 related to military service                                                                                                                                                                                                                                                                                                                                                                                                                                                                                                                                                                                                                              |
| airman           | 7/8 <b>not</b> related to military service (eg chairman, repairman)                                                                                                                                                                                                                                                                                                                                                                                                                                                                                                                                                                                          |
| active duty      | 2/2 related to military service                                                                                                                                                                                                                                                                                                                                                                                                                                                                                                                                                                                                                              |
| infantry         | 16/16 related to military service                                                                                                                                                                                                                                                                                                                                                                                                                                                                                                                                                                                                                            |
| posted           | 27/36 related to military service                                                                                                                                                                                                                                                                                                                                                                                                                                                                                                                                                                                                                            |
| deploy*          | 10/14 related to military service                                                                                                                                                                                                                                                                                                                                                                                                                                                                                                                                                                                                                            |
| peace keeping    | No records found                                                                                                                                                                                                                                                                                                                                                                                                                                                                                                                                                                                                                                             |
| Afghan*          | 8/21 relate to military service                                                                                                                                                                                                                                                                                                                                                                                                                                                                                                                                                                                                                              |
| Iraq             | 11/20 relate to military service                                                                                                                                                                                                                                                                                                                                                                                                                                                                                                                                                                                                                             |
| Falklands        | 6/7 relate to military service                                                                                                                                                                                                                                                                                                                                                                                                                                                                                                                                                                                                                               |
| Northern Ireland | 30/50 related to military service                                                                                                                                                                                                                                                                                                                                                                                                                                                                                                                                                                                                                            |
| Bosnia           | 9/9 related to military service                                                                                                                                                                                                                                                                                                                                                                                                                                                                                                                                                                                                                              |
| Kosovo           | 1/5 related to military service                                                                                                                                                                                                                                                                                                                                                                                                                                                                                                                                                                                                                              |
| Korea            | 5/10 related to military service                                                                                                                                                                                                                                                                                                                                                                                                                                                                                                                                                                                                                             |
| Gulf War         | 5/7 related to military service                                                                                                                                                                                                                                                                                                                                                                                                                                                                                                                                                                                                                              |
| WW2              | 5/11 related to military service                                                                                                                                                                                                                                                                                                                                                                                                                                                                                                                                                                                                                             |
| WWII             | 10/21 related to military service                                                                                                                                                                                                                                                                                                                                                                                                                                                                                                                                                                                                                            |
| *World War*      | 81 records returned                                                                                                                                                                                                                                                                                                                                                                                                                                                                                                                                                                                                                                          |
| called up        | 28/28 related to military service                                                                                                                                                                                                                                                                                                                                                                                                                                                                                                                                                                                                                            |
| fought in        | 4/4 related to military service                                                                                                                                                                                                                                                                                                                                                                                                                                                                                                                                                                                                                              |
| served in        | 80/81 related to military service (exclude "observed in")                                                                                                                                                                                                                                                                                                                                                                                                                                                                                                                                                                                                    |
| Regiments        | <p>Royal Artillery<br/>                     Royal Engineers<br/>                     Women's Royal Army Corps<br/>                     Royal Fusiliers<br/>                     Royal Army Service Corps<br/>                     Royal Green Jackets<br/>                     Royal Military Police<br/>                     Army Education Corps<br/>                     Royal Army Pay Corps<br/>                     Royal Electrical and Mechanical Engineers</p> <p>Exceptions<br/>                     Royal Bank of Scotland<br/>                     Royal Bethlem Hospital<br/>                     "Joined the Royal Army for short period"?</p> |

Table 4: Aggregated results for leave-one-out validation methodology applied to the final machine learning classifier reported with 95% Confidence Interval.

|                                  | <b>Military Service Identification Tool</b> |                 |
|----------------------------------|---------------------------------------------|-----------------|
|                                  | <b>Veteran</b>                              | <b>Civilian</b> |
| <b>Veteran</b>                   | 803                                         | 48              |
| <b>Civilian</b>                  | 62                                          | 3287            |
| <b>Positive predictive value</b> | 0.94 (CI: 0.91-0.95)                        |                 |
| <b>Negative predictive value</b> | 0.98 (CI: 0.92-0.98)                        |                 |
| <b>Sensitivity</b>               | 0.92 (CI: 0.89-0.93)                        |                 |
| <b>F1 score</b>                  | 0.93 (CI: 0.91-0.93)                        |                 |
| <b>Youden Index</b>              | 0.97 (CI: 0.94-0.98)                        |                 |
